# Supplementary material for: Co-alloying of Sn and Te enables high thermoelectric performance in Ag9GaSe6
Source: Royal Society of Chemistry journal article supplement (doi:10.1039/d3ta01291c), 2023-01-01
Supplement: d3ta01291c1.pdf [file d3ta01291c1.pdf]

## Supplementary Information

### Co-alloying of Sn and Te Enables High Thermoelectric

#### Performance in $\text{Ag}_9\text{GaSe}_6$

*Min Li<sup>1,2</sup>, Hexige Wuliji<sup>3</sup>, Zhengyang Zhou<sup>1</sup>, Pengfei Qiu<sup>1</sup>, Kunpeng Zhao<sup>3\*</sup>, and Xun Shi<sup>1,2\*</sup>*

<sup>1</sup>State Key Laboratory of High Performance Ceramics and Superfine Microstructure, Shanghai Institute of Ceramics, Chinese Academy of Sciences, Shanghai 200050, China.

<sup>2</sup>University of Chinese Academy of Sciences, Beijing 100049, China.

<sup>3</sup>State Key Laboratory of Metal Matrix Composites, School of Materials Science and Engineering, Shanghai Jiao Tong University, Shanghai, 200240, China

\*Corresponding author. Email: [zhp.1989@sjtu.edu.cn](mailto:zhp.1989@sjtu.edu.cn); [xshi@mail.sic.ac.cn](mailto:xshi@mail.sic.ac.cn)

#### Calculation of the minimum lattice thermal conductivity

Based on the simplified Cahill's model, the minimum lattice thermal conductivity  $\kappa_{min}$  for a normal solid can be expressed as[1, 2]

$$\kappa_{min} = \frac{1}{2} \left( \frac{\pi}{6} \right)^{1/3} kn^{2/3} (2v_t + v_l)$$

where  $v_t$  is the transverse speed of sound,  $v_l$  is the longitudinal speed of sound, and  $n$  is the number density of atoms. Besides, an assessment of the high temperature diffusion limit of the lattice thermal conductivity is made possible by the obtained sound velocities based on the following equation[3, 4]:

$$\kappa_{diff} = 0.76kn^{2/3} \frac{1}{3} (2v_t + v_l).$$

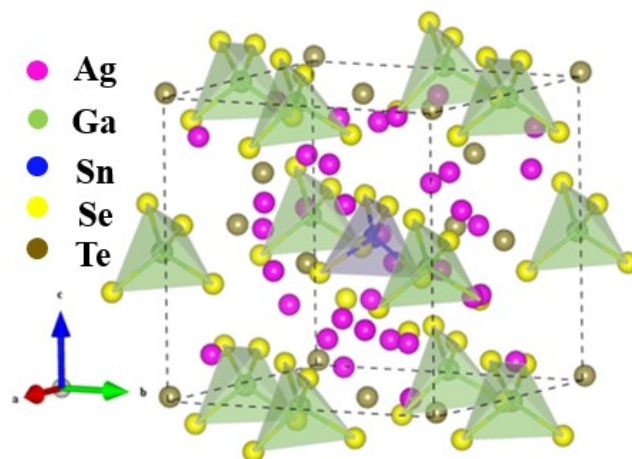

**Figure S1.** The crystal structure of  $\text{Ag}_{8.75}\text{Ga}_{0.75}\text{Sn}_{0.25}\text{Se}_{4.5}\text{Te}_{1.5}$  used for theoretical calculations.

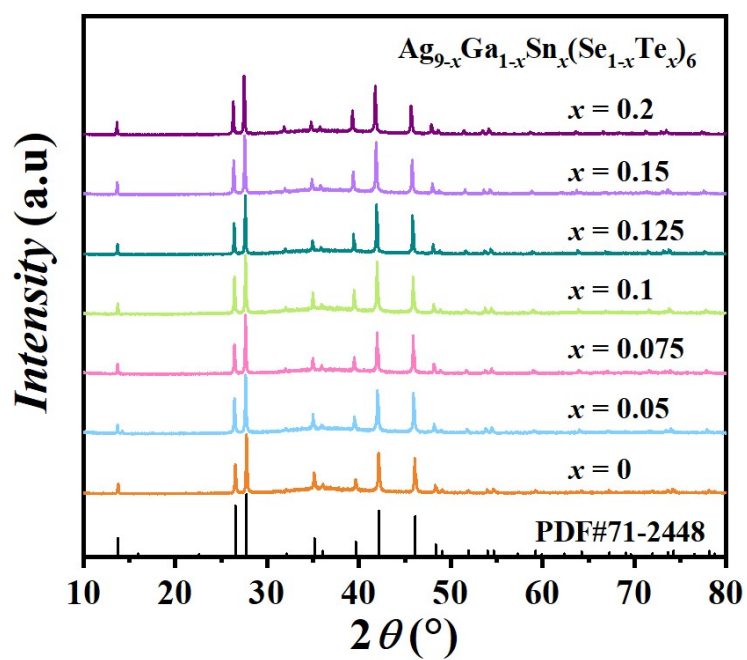

**Figure S2.** The room temperature PXRD patterns for  $\text{Ag}_{9-x}\text{Ga}_{1-x}\text{Sn}_x(\text{Se}_{1-x}\text{Te}_x)_6$  ( $x = 0, 0.05, 0.075, 0.1, 0.125, 0.15, \text{ and } 0.2$ ).

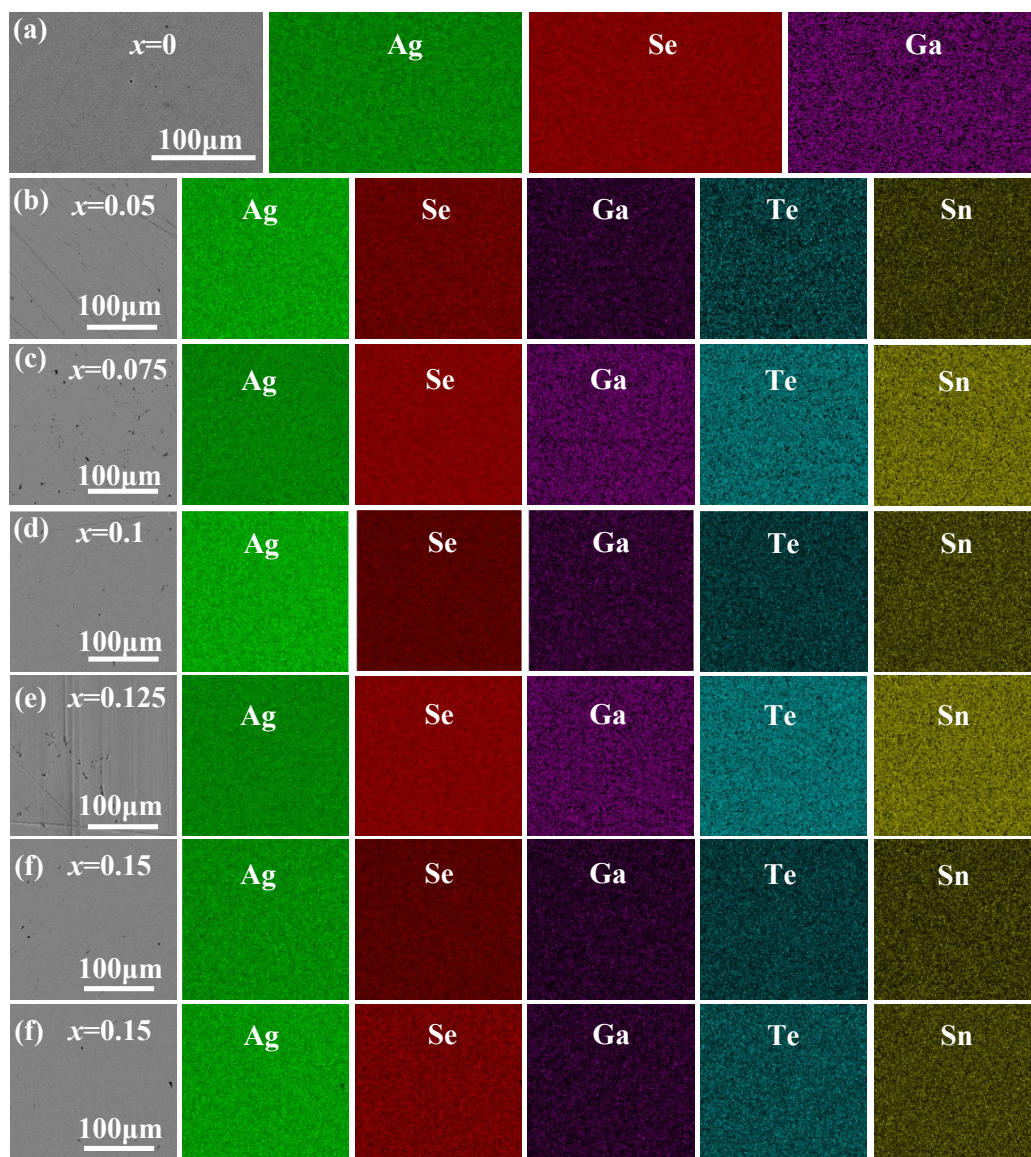

**Figure S3.** (a) SEM images (BSE model) and corresponding EDS mappings observed in  $\text{Ag}_{9-x}\text{Ga}_{1-x}\text{Sn}_x(\text{Se}_{1-x}\text{Te}_x)_6$  ( $x = 0, 0.05, 0.075, 0.1, 0.125, 0.15, \text{ and } 0.2$ ).

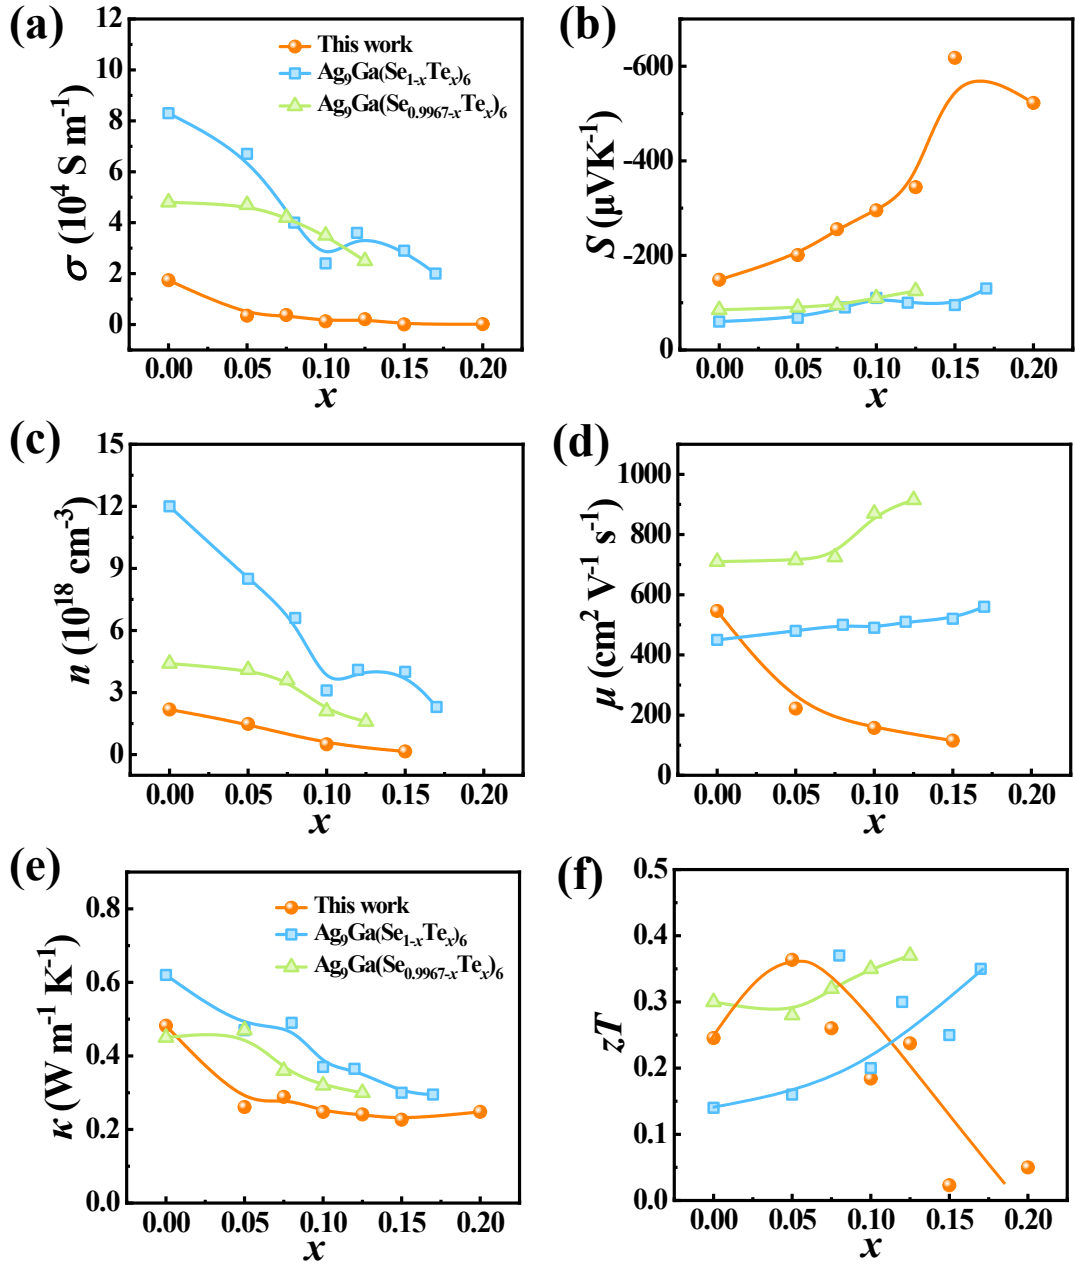

**Figure S4.** Room temperature (a) electrical conductivity ( $\sigma$ ), (b) Seebeck coefficient ( $S$ ), (c) carrier concentration ( $n$ ), (d) carrier mobility ( $\mu$ ), (e) thermal conductivity ( $\kappa$ ), and (f) TE figure of merit  $zT$  as a function of alloying content  $x$  for  $\text{Ag}_{9-x}(\text{Ga}_{1-x}\text{Sn}_x)(\text{Se}_{1-x}\text{Te}_x)_6$ . The data of  $\text{Ag}_9\text{Ga}(\text{Se}_{0.9967-x}\text{Te}_x)_6$  from Ref [5] and  $\text{Ag}_9\text{Ga}(\text{Se}_{1-x}\text{Te}_x)_6$  from Ref [6] are included for comparison.

**Table S1.** Element composition obtained from the EDS results for  $\text{Ag}_{9-x}\text{Ga}_{1-x}\text{Sn}_x(\text{Se}_{1-x}\text{Te}_x)_6$  ( $x = 0, 0.05, 0.075, 0.1, 0.125, 0.15, \text{ and } 0.2$ ).

| Samples     | Ag   | Ga  | Sn  | Se   | Te  |
|-------------|------|-----|-----|------|-----|
| $x = 0$     | 56.4 | 6.1 |     | 37.5 |     |
| $x = 0.05$  | 56.0 | 5.8 | 0.1 | 36.0 | 2.1 |
| $x = 0.075$ | 56.2 | 5.7 | 0.2 | 35.3 | 2.9 |
| $x = 0.1$   | 55.9 | 5.7 | 0.3 | 34.2 | 3.9 |
| $x = 0.125$ | 55.9 | 5.4 | 0.4 | 33.5 | 4.8 |
| $x = 0.15$  | 55.8 | 5.3 | 0.6 | 32.6 | 5.7 |
| $x = 0.2$   | 55.6 | 5.0 | 1.0 | 30.8 | 7.6 |

## References

- [1] D.G. Cahill, S.K. Watson, R.O. Pohl, *Phys. Rev. B*, 46 (1992) 6131.
- [2] K. Imasato, S. Ohno, S.D. Kang, G.J. Snyder, *APL Materials*, 6 (2018) 016106.
- [3] M.T. Agne, R. Hanus, G.J. Snyder, *Energy Environ. Sci.*, 11 (2018) 609-616.
- [4] T. Bernges, R. Hanus, B. Wankmiller, K. Imasato, S. Lin, M. Ghidui, M. Gerlitz, M. Peterlechner, S. Graham, G. Hautier, Y. Pei, M.R. Hansen, G. Wilde, G.J. Snyder, J. George, M.T. Agne, W.G. Zeier, *Adv. Energy Mater.*, 12 (2022) 2200717.
- [5] S. Lin, Wen Li, S. Li, X. Zhang, Z. Chen, Y. Xu, Y. Chen, Y. Pei, *Joule*, 1 (2017) 816-830.
- [6] B. Jiang, P. Qiu, H. Chen, et al., *Mater. Today Phys.* 5(2018), 20-28.
